# Supplementary material
Source: PubMed Central journal article supplement (PMC4899280)
Supplement: NIHMS787287-supplement-Supplemental_Figure_1.pdf [file NIHMS787287-supplement-Supplemental_Figure_1.pdf]

Supplemental Figure 1. Distributions of the timing of discharge for each course  
A.

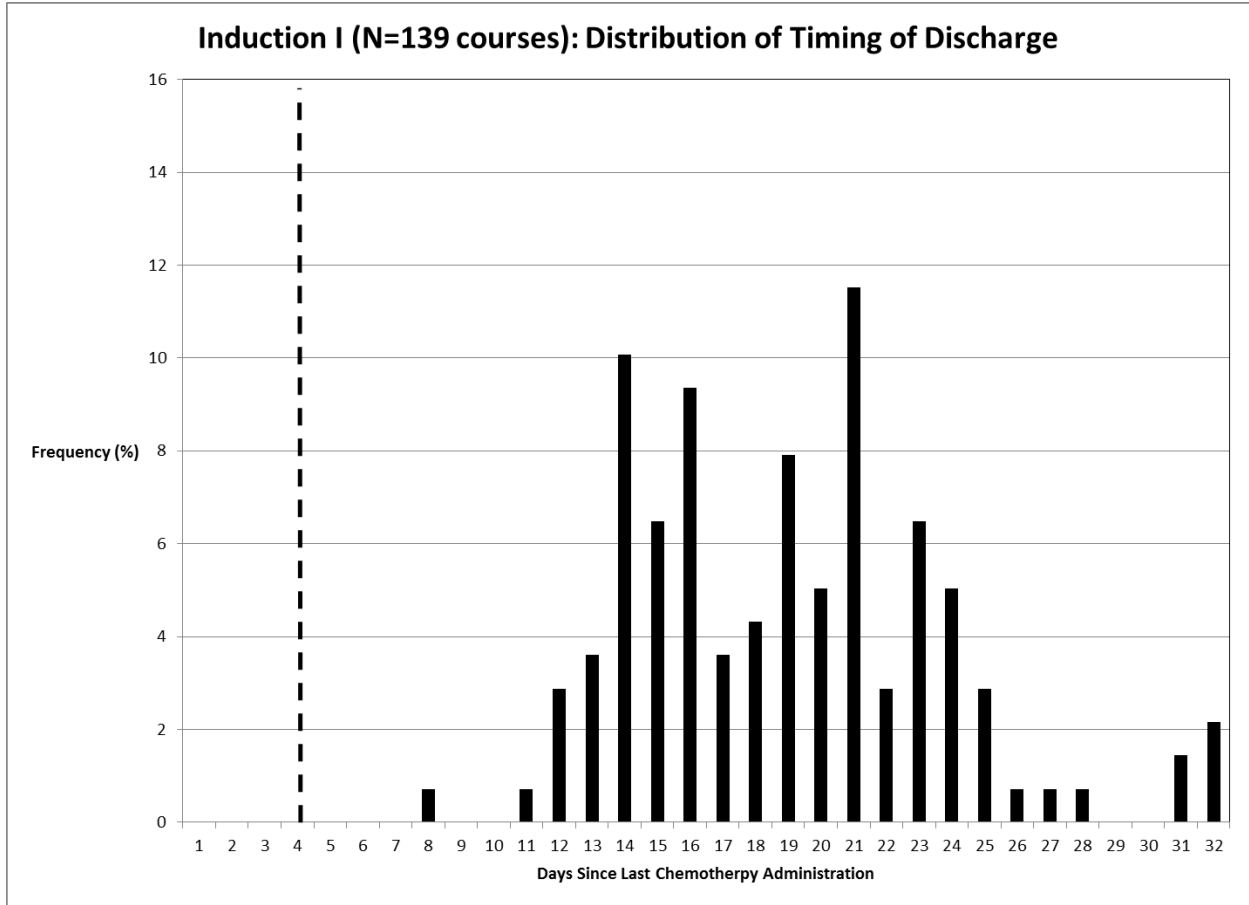

B.

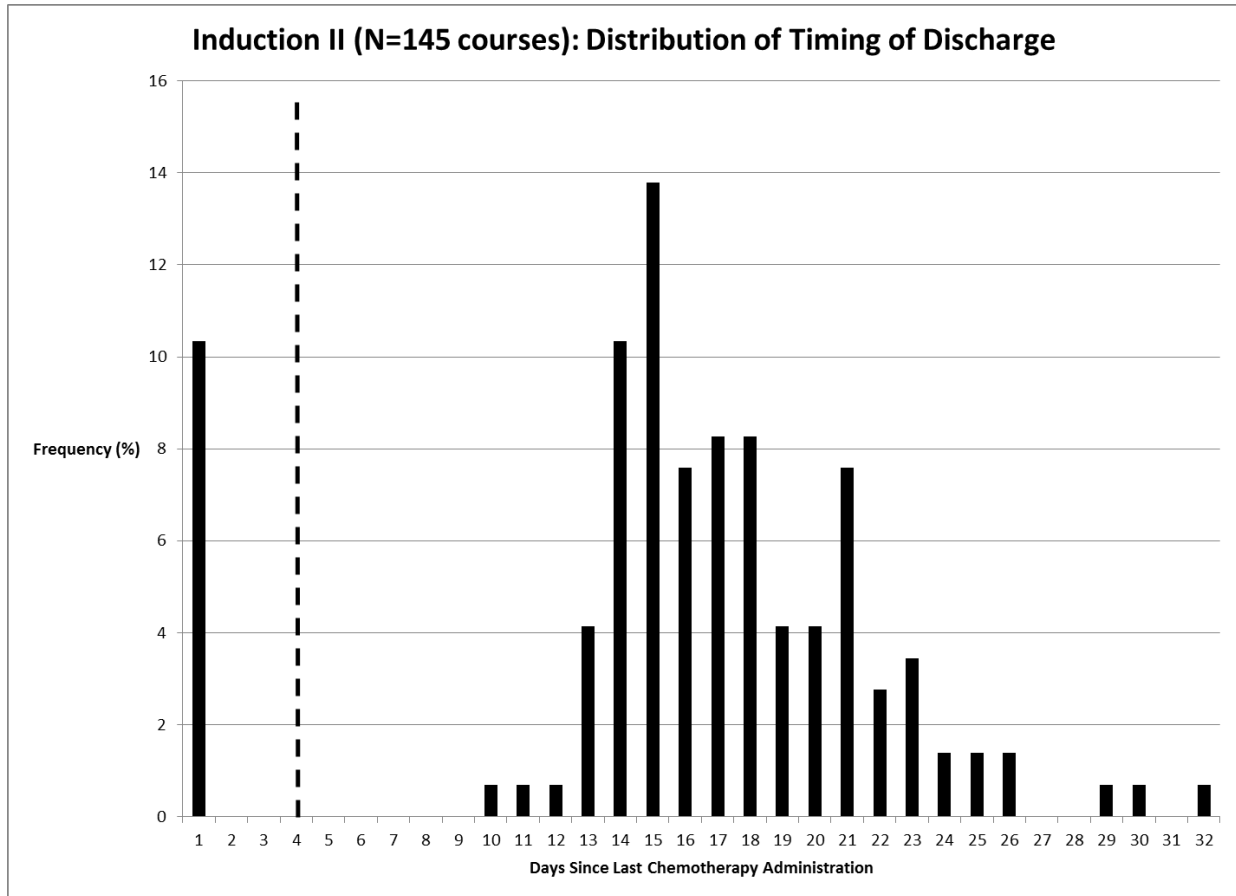

C.

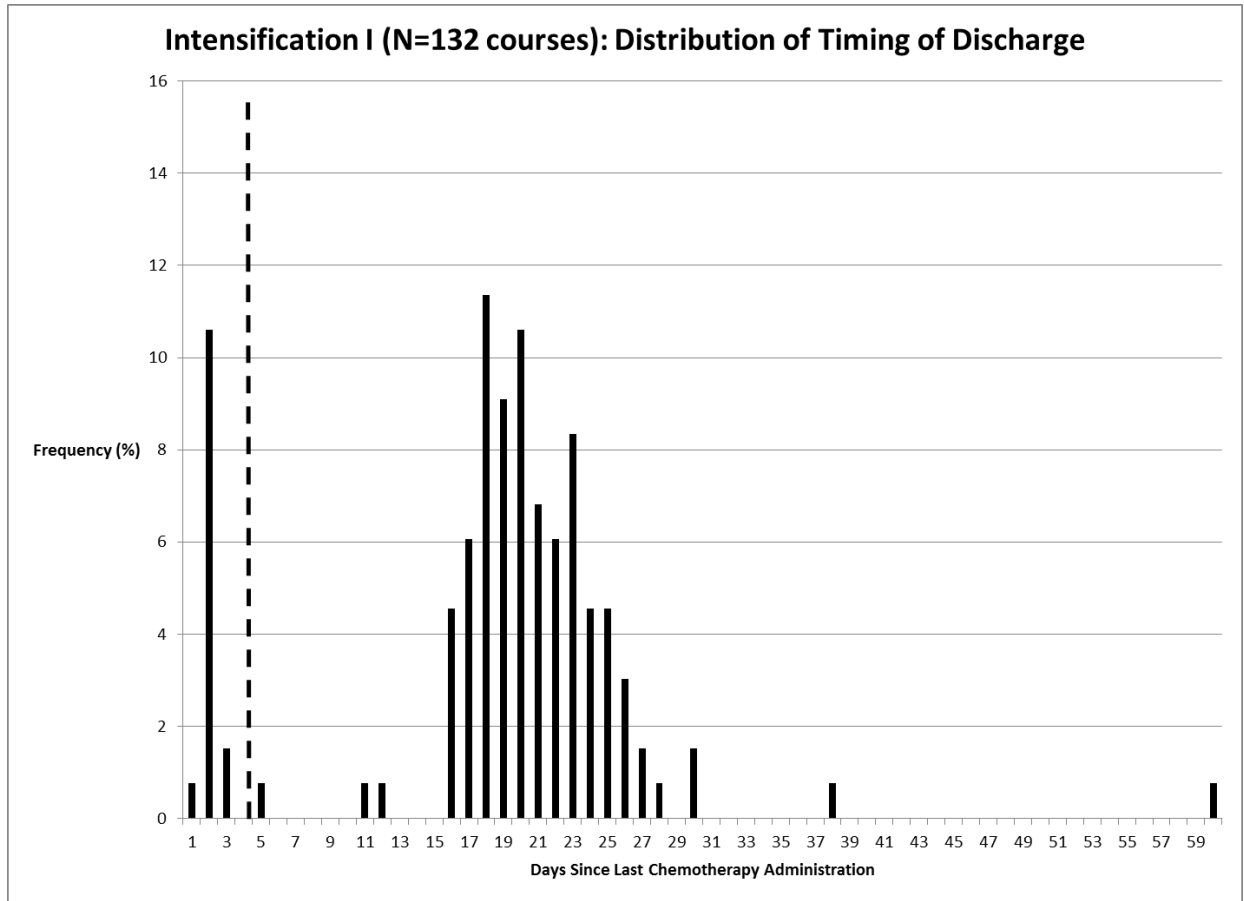

D.

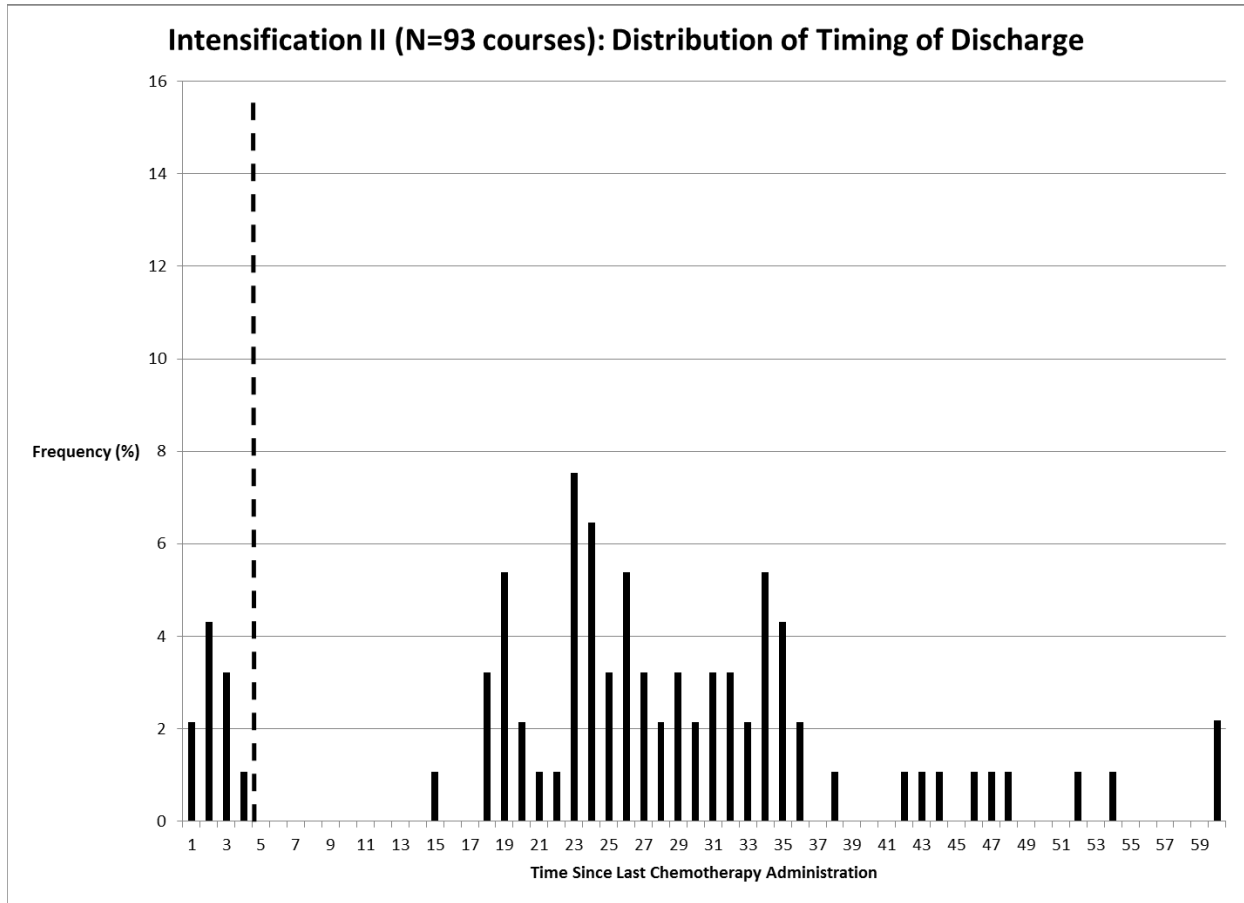

E.

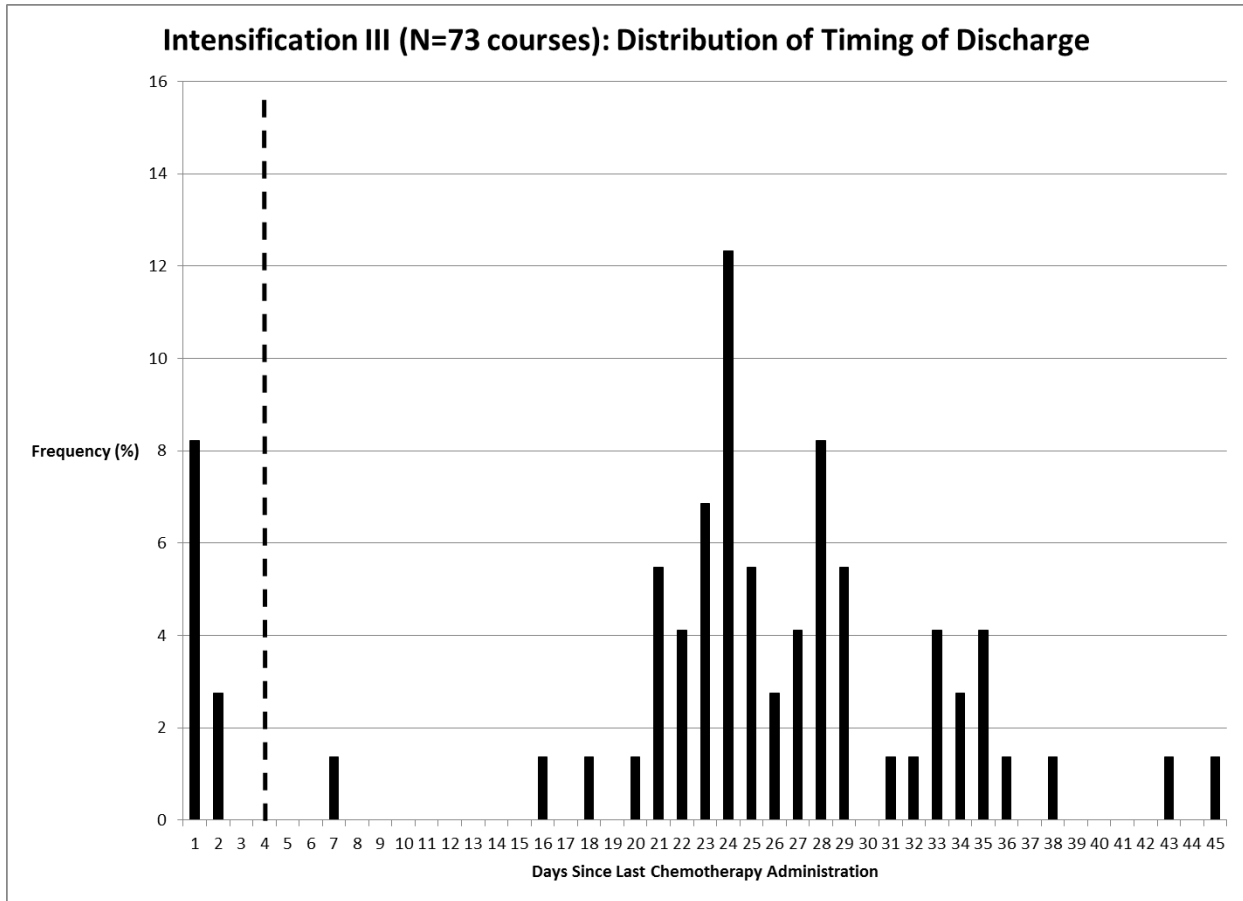

Vertical dashed line indicates cut-off for early discharge. Panel A shows the distribution of the timing of discharge for Induction I. Panel B shows the distribution of the timing of discharge for Induction II. Panel C shows the distribution of the timing of discharge for Intensification I. Panel D shows the distribution of the timing of discharge for Intensification II. Panel E shows the distribution of the timing of discharge for Intensification III.
